# Supplementary material for: Molecular basis of stepwise cyclic tetra-adenylate cleavage by the type III CRISPR ring nuclease Crn1/Sso2081
Source: PubMed Central journal article supplement (PMC10018336; doi:10.1093/nar/gkad101), 2023-02-20
Supplement: gkad101_supplemental_file.pdf [file gkad101_supplemental_file.pdf]

**Molecular basis of stepwise cyclic tetra-adenylate cleavage by the  
type III CRISPR ring nuclease Crn1/Sso2081**

**Liyang Du<sup>1</sup>, Danping Zhang<sup>1</sup>, Zhipu Luo<sup>2,\*</sup> & Zhonghui Lin<sup>1,\*</sup>**

<sup>1</sup>College of Chemistry, Fuzhou University, Fuzhou 350108, China.

<sup>2</sup>Institute of Molecular Enzymology, School of Biology and Basic Medical Sciences,  
Soochow University, Suzhou, China.

\*Correspondence: E-mail: [luozhipu@suda.edu.cn](mailto:luozhipu@suda.edu.cn) (Z. Luo); [zhonghui.lin@fzu.edu.cn](mailto:zhonghui.lin@fzu.edu.cn)

[\(Z. Lin\)](#)

## SUPPLEMENTARY FIGURES

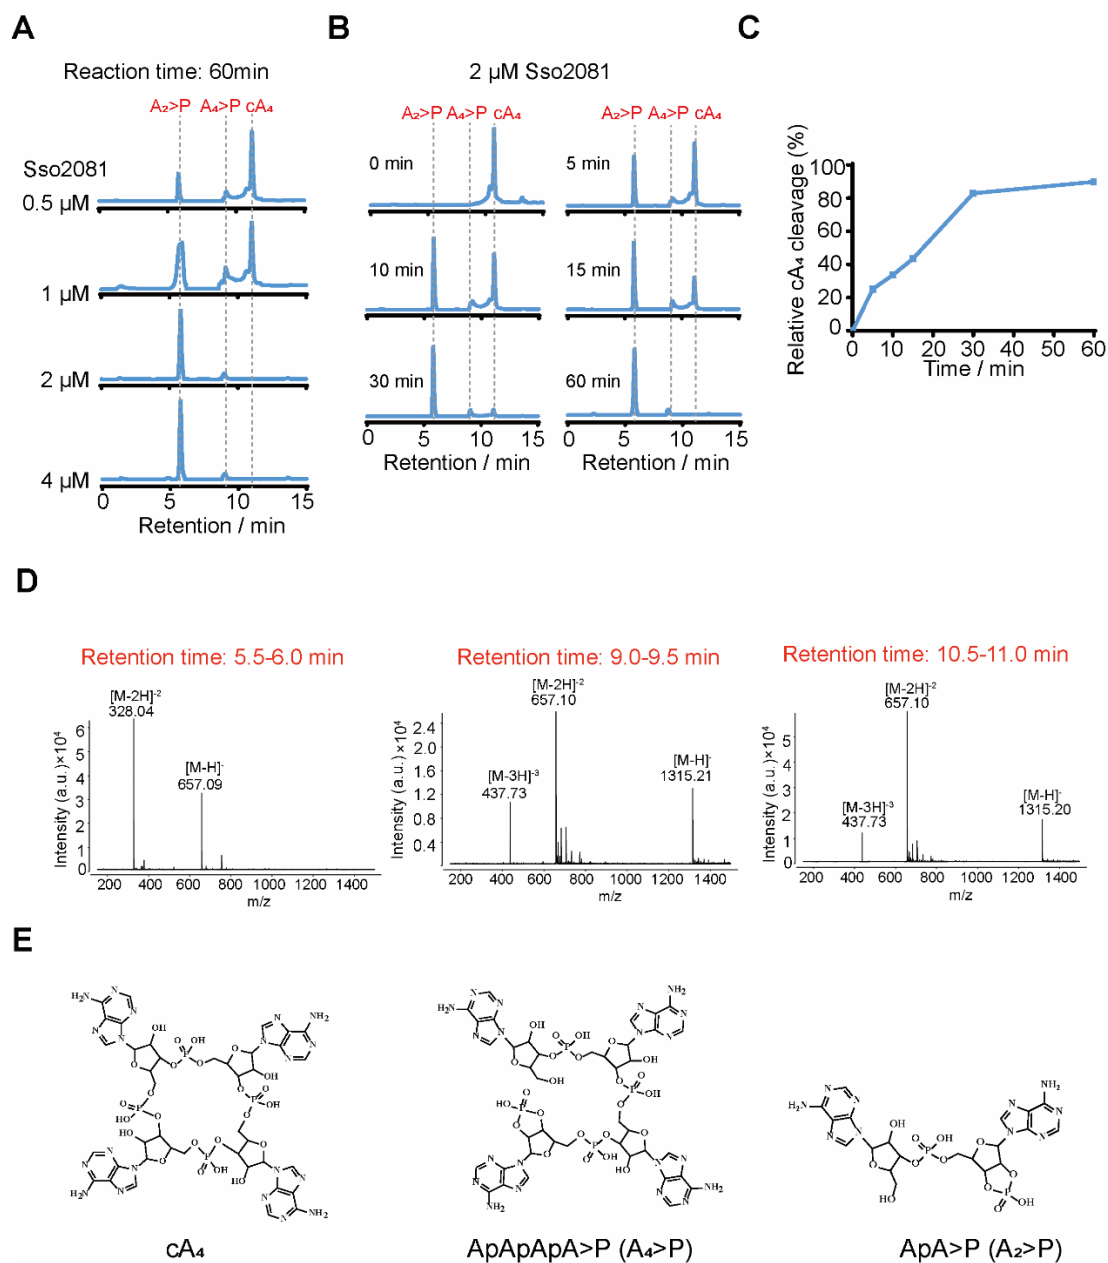

**Supplementary Fig. S1 LC and MS analyses of cA<sub>4</sub> cleavage by Sso2081. (A)** LC spectra of the reaction products of cA<sub>4</sub> with increasing concentrations of Sso2081. Reactions were conducted at 60 °C for 60 min. **(B)** LC spectra of the reaction products of cA<sub>4</sub> with 2  $\mu\text{M}$  Sso2081 at 60 °C for 0 ~ 60 min. **(C)** The kinetic plot of cA<sub>4</sub> cleavage in (B). **(D)** Mass spectra of the samples eluted from HPLC column at indicated retention

times. Retention time 5.5-6.0:  $m/z$  657.09 for  $A_2>P^{-1}$  ( $ApA>P^{-1}$ );  $m/z$  328.04 for  $A_2>P^{-2}$ ; Retention time 9.0-9.5 min:  $m/z$  1315.21 for  $A_4>P^{-1}$  ( $ApApApA>P^{-1}$ ); 657.10 for  $A_4>P^{-2}$ ; 437.73 for  $A_4>P^{-3}$ ; Retention time 10.5-11.0:  $m/z$  1315.20 for  $cA_4^{-1}$ ;  $m/z$  657.10 for  $cA_4^{-2}$ ;  $m/z$  437.73 for  $cA_4^{-3}$ . **(E)** The chemical structures of  $cA_4$  and the cleavage products.

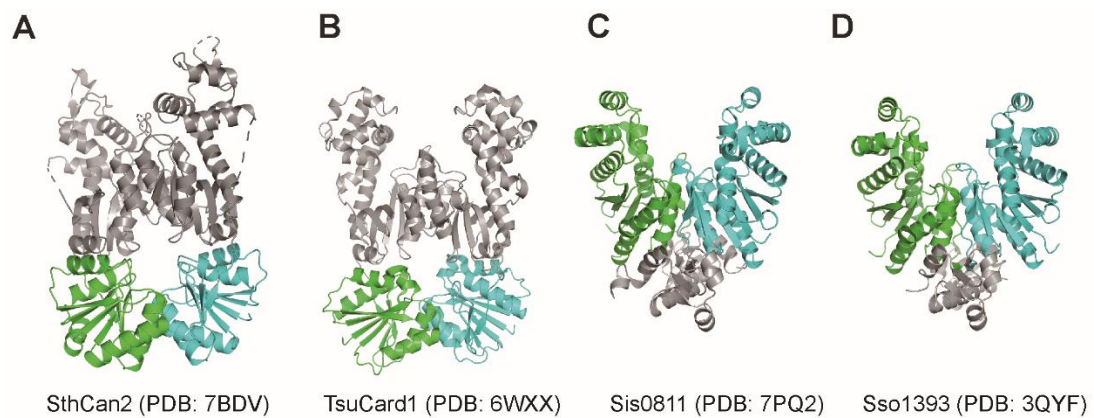

**Supplementary Fig. S2 Comparison of the structures between various CARF domain-containing proteins.** A-D, Structures SthCan2, TsuCard1, Sis0811 and Sso1393. The structures are shown in cartoon representation. CARF domains are highlighted in green / cyan colors. Sis, *Sulfolobus islandicus*; Sso, *Sulfolobus solfataricus*; Sth, *Sulfobacillus thermosulfidooxidans*; Tsu, *Treponema succinifaciens*.

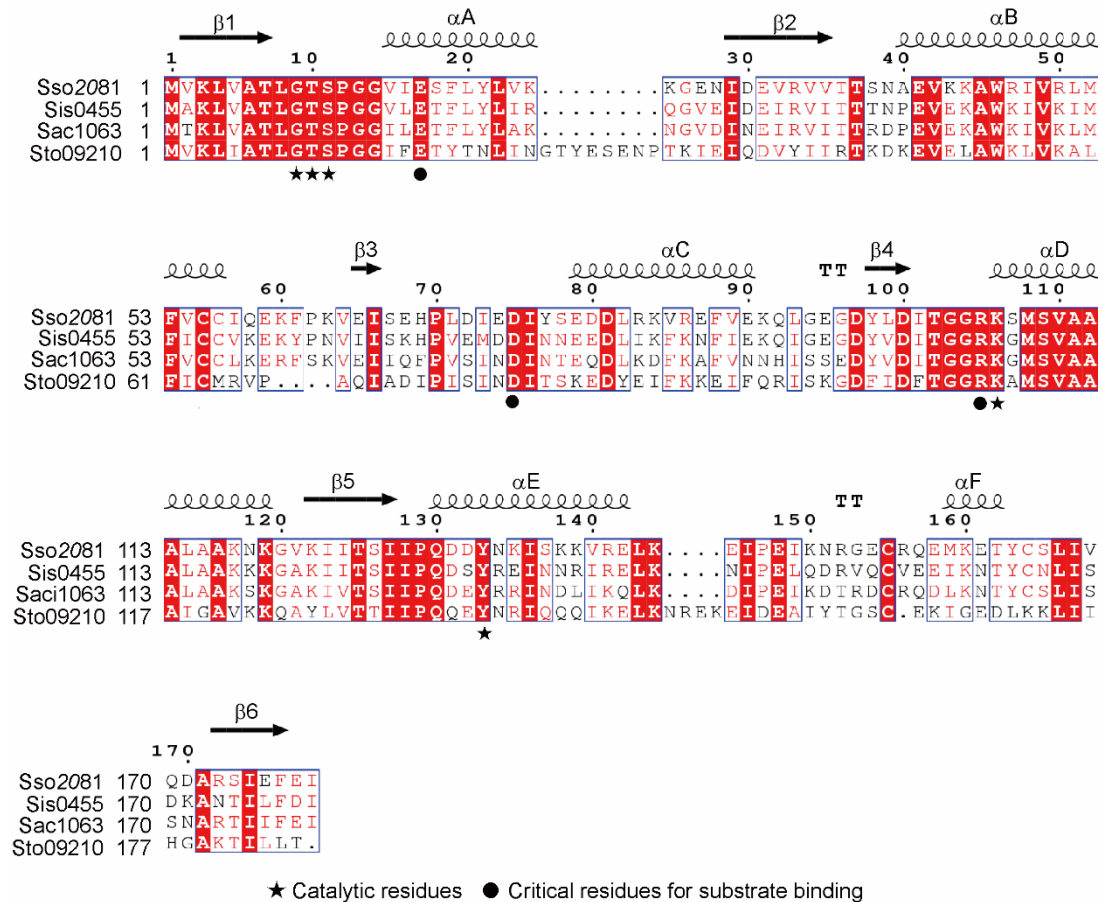

**Supplementary Fig. S3 Sequence alignment of Sso2081 with its structural homologs.** The alignment is generated using the online ESPript 3.0 server. Secondary structural elements of Sso2081 are indicated above the sequences. Abbreviations: Sso, *Saccharolobus solfataricus*; Sis, *Sulfolobus islandicus*; Sac, *Sulfolobus acidocaldarius*. Sto, *Sulfolobus tokodaii*;

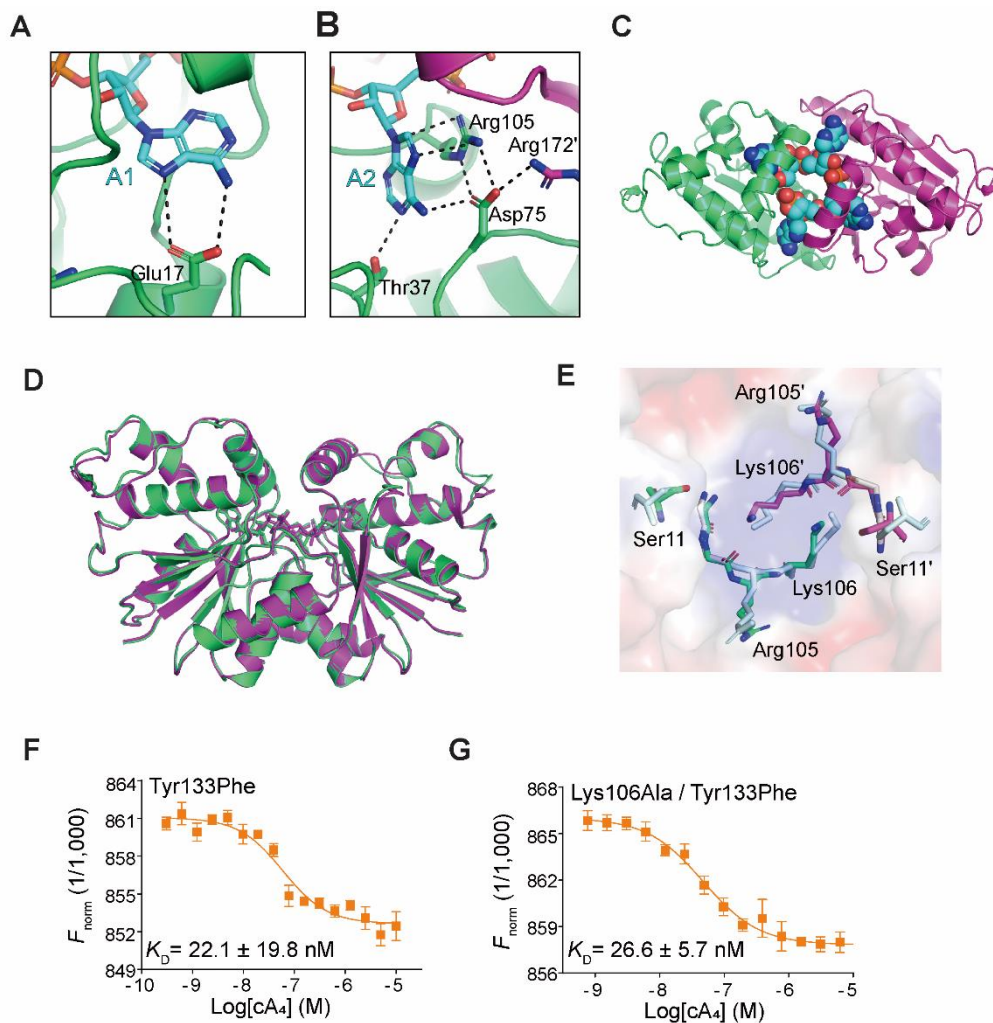

**Supplementary Fig. S4 Structural comparison between cA<sub>4</sub>- and A<sub>4</sub>>P-bound Sso2081.** (A, B) The adenine binding sites for A1 (A) and A2 (B) of cA<sub>4</sub> in the complex of Sso2081/cA<sub>4</sub>. (C) Top-view of the structure of Sso2081/A<sub>4</sub>>P complex. Sso2081 is shown in cartoon representation and cA<sub>4</sub> is in sphere. (D) Superposition of the structures of cA<sub>4</sub>- (green) and A<sub>4</sub>>P- (magenta) bound Sso2081. (E) Local conformational changes in the active site of Sso2081 between phosphate- (light blue) and cA<sub>4</sub>- (green and magenta) bound Sso2081. The structure is overlaid with 80% transparent surface of the active site of cA<sub>4</sub>-bound Sso2081. (F, G) Binding isotherms

for cA<sub>4</sub> to Sso2081<sup>Tyr133Phe</sup> (F) and Sso2081<sup>Lys106Ala/Tyr133Phe</sup> (G) by the MST binding assay. Values are means  $\pm$  SD, n = 3.

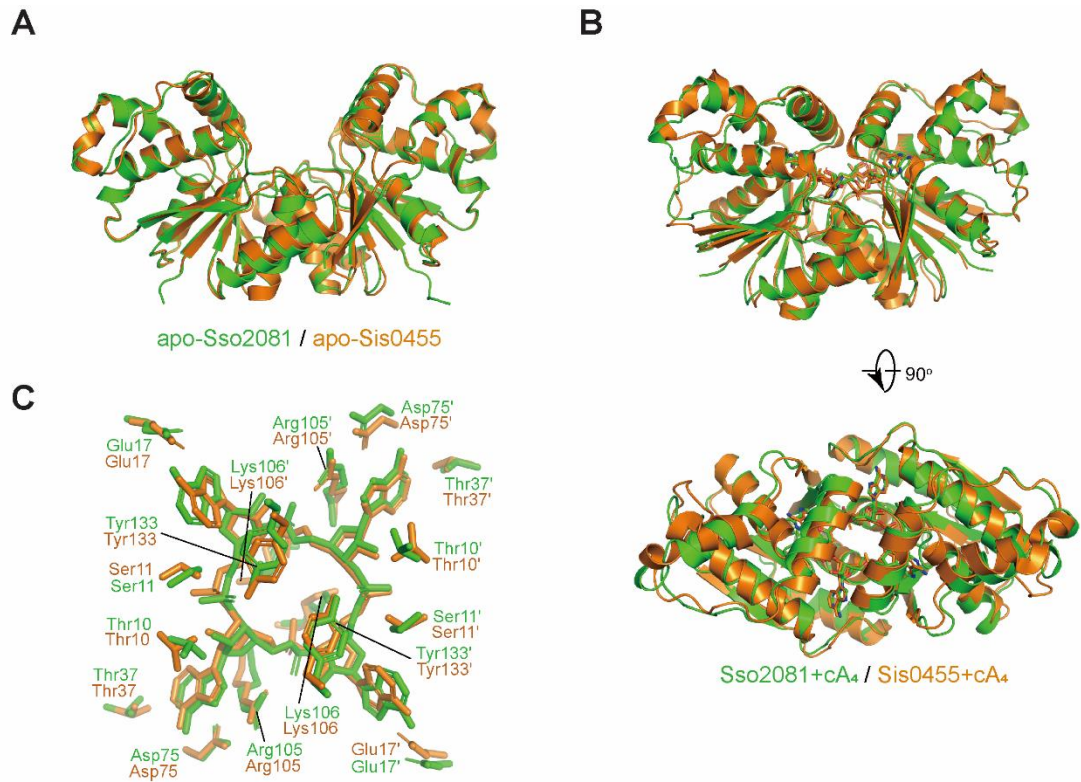

**Supplementary Fig. S5 Structural comparison between Sso2081 and Sis0455. (A)**

Structural comparison between apo-Sso2081 (green) and apo-Sis0455 (orange, PDB:

7Z56) from side view. **(B)** Structural comparison between cA<sub>4</sub>-bound Sso2081 (green)

and Sis0455 (orange, PDB: 7Z55) from both side (top panel) and top (bottom panel)

views. **(C)** Comparison of the cA<sub>4</sub>-binding residues between Sso2081 and Sis0455.



**A**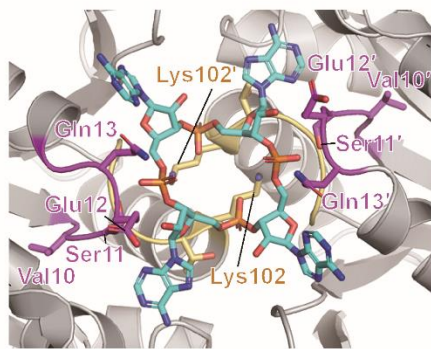Card1 CARF:cA<sub>4</sub> (PDB:6WXX)**B**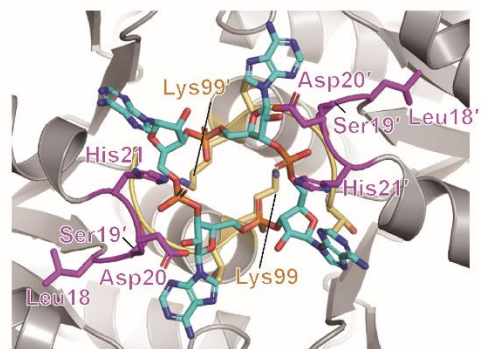Can2 CARF:cA<sub>4</sub> (PDB:7BDV)

**Supplementary Fig. S6 The cA<sub>4</sub> binding site of Card1 and Can2.** (A) The cA<sub>4</sub> binding site in the structure of TsuCard1 in complex with cA<sub>4</sub> (PDB: 6WXX). (B) The cA<sub>4</sub> binding site of Can2 in the structure of SthCan2 in complex with cA<sub>4</sub> (PDB: 7BDV). cA<sub>4</sub> is shown in cyan stick. Key residues in motif-I and motif-II are labeled and shown in magenta and yellow sticks, respectively.
